# Supplementary material for: Transcriptome Analysis Unveils Gln3 Role in Amino Acids Assimilation and Fluconazole Resistance in Candida glabrata
Source: PubMed Central journal article supplement (PMC9705932; doi:10.4014/jmb.2012.12034), 2021-04-21
Supplement: jmb-31-5-659-supple1.pdf [file jmb-31-5-659-supple1.pdf]

## **Supplementary information for**

Transcriptome analysis unveils Gln3 role in amino acids assimilation and fluconazole resistance in *Candida glabrata*

Francisco J. Pérez-de los Santos (0000-0003-4753-3691)<sup>1,2</sup>, Luis Fernando García-Ortega (000-0002-2021-7165)<sup>1,3</sup>, Karina Robledo-Márquez (0000-0002-2737-5756)<sup>2</sup>, Jesús Guzmán-Moreno (0000-0003-0237-6493)<sup>2</sup> and Lina Riego-Ruiz (0000-0002-2883-8871)<sup>2\*</sup>.

## **Affiliations**

<sup>1</sup> Unidad de Genómica Avanzada, Laboratorio Nacional de Genómica para la Biodiversidad (Langebio), CINVESTAV.

<sup>2</sup> División de Biología Molecular, Instituto Potosino de Investigación Científica y Tecnológica A. C. (IPICYT).

<sup>3</sup> Departamento de Ingeniería Genética, Centro de Investigación de Estudios Avanzados del IPN (CINVESTAV).

\* Corresponding author.

## Table of contents

|                   |   |
|-------------------|---|
| Figure S1         | 3 |
| Figure S2         | 4 |
| Figure S3         | 5 |
| Figure S4         | 6 |
| References        | 6 |
| Additional File 1 | 7 |
| Additional File 2 | 8 |
| Additional File 3 | 8 |
| Additional File 4 | 8 |
| Additional File 5 | 8 |
| KEGG_up_genes     |   |
| KEGG_down_genes   |   |

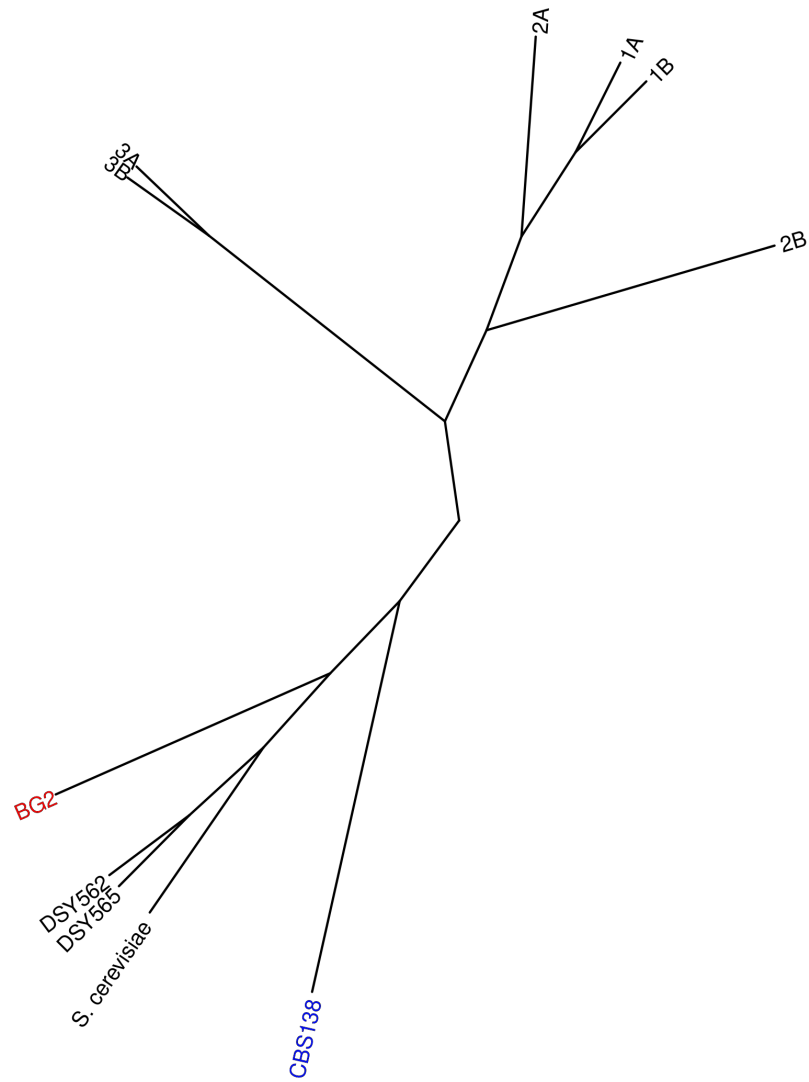

**Figure S1.** Phylogenetic tree based on 5,280 orthogroups obtained by STAG algorithm in OrthoFinder [1] of *Candida glabrata* strains sequenced and publicly available in the NCBI database. *Saccharomyces cerevisiae* S288c was used as outgroup. Tree was drawn with R and ggtree package [2].

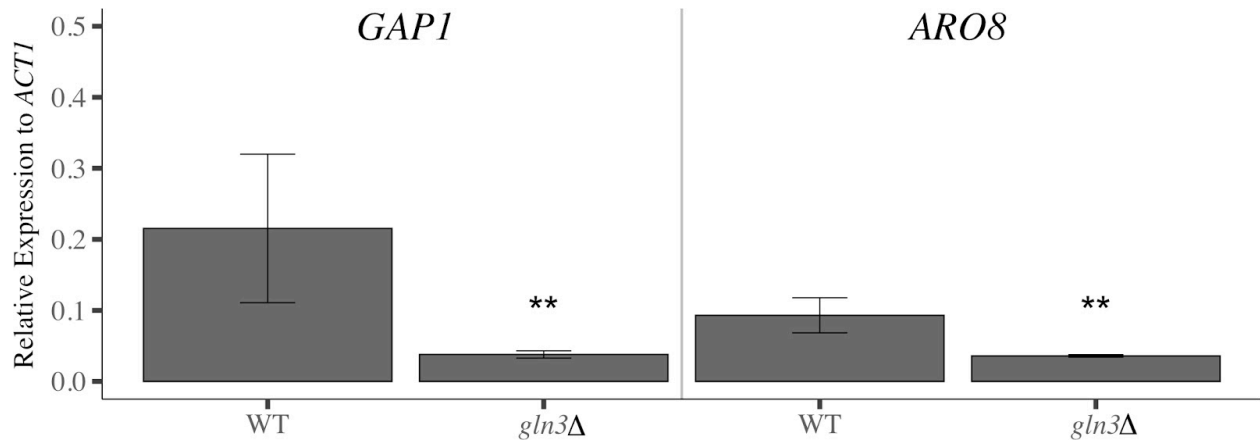

**Figure S2.** *ARO8* gene expression in MM with ammonium as sole nitrogen source. Gene expression of *ARO8* and *GAPI* was determined through qPCR of cDNA synthesized from 5  $\mu$ g of total RNA extracted from yeast cultures on MM with ammonium as sole nitrogen source. *GAPI* gene expression was used as a control according to [17]. *ARO8* and *GAPI* expressions are relative to *ACT1* gene expression. Relative gene expression represents the mean of three independent experiments and two technical replicates  $\pm$  standard deviation. \*\* Gene expression is significantly different from the one calculated in the WT strains,  $\alpha < 0.01$  in a two-tailed t-test.

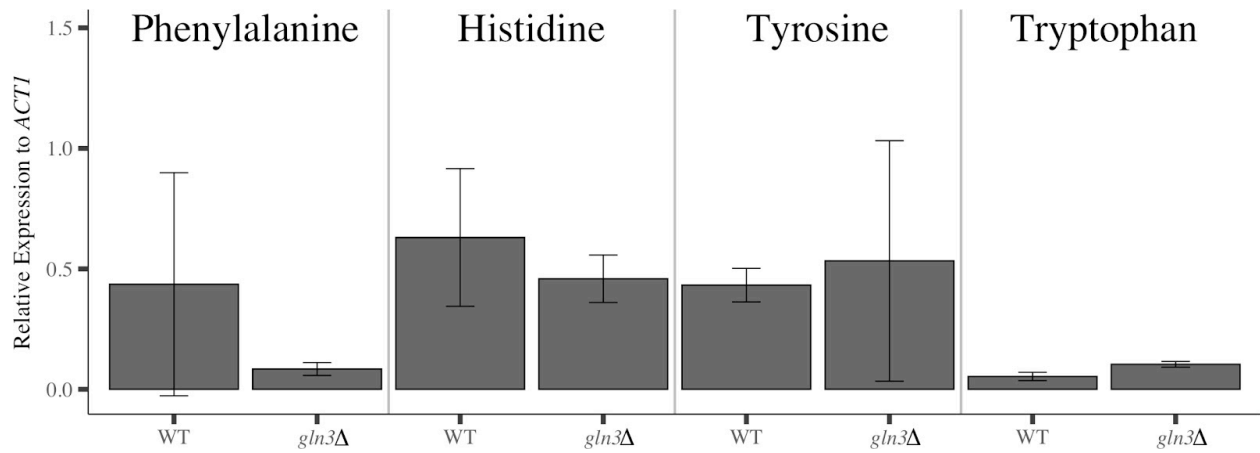

**Figure S3.** *ARO8* gene expression in MM with histidine or AAA as nitrogen sources. Gene expression of *ARO8* was determined through qPCR of cDNA synthesized from 5  $\mu$ g of total RNA extracted from yeast cultures on MM with the indicated nitrogen sources. *ARO8* expression is relative to *ACT1* gene expression, and showed non-significant difference between the WT and *gln3Δ* strains in a two-tailed t-test. Relative gene expression represents the mean of three independent experiments and two technical replicates  $\pm$  standard deviation.

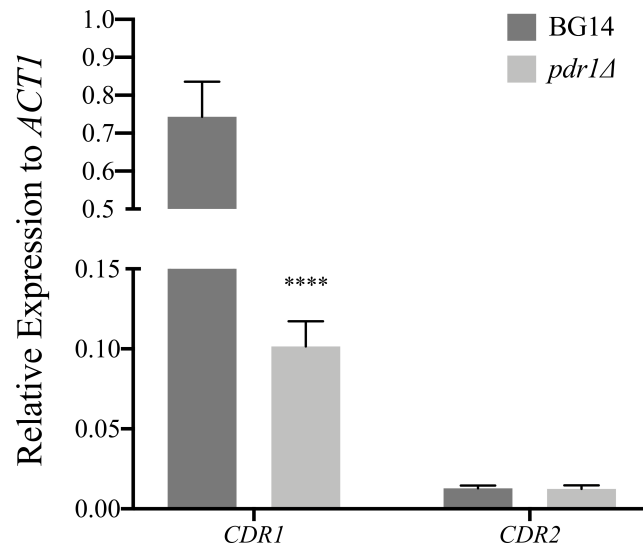

**Figure S4.** *CDR1* and *CDR2* gene expression in MM with ammonium as sole nitrogen source.

Gene expression of *CDR1* and *CDR2* was determined in 5 µg of total RNA extracted from yeast cultures on MM with ammonium as sole nitrogen source. The reported gene expression is relative to *ACT1* and was measured through qPCR. Relative gene expression represents the mean of three independent experiments and six technical replicates ± standard deviation. \*\*\*\* Gene expression is significantly different from the calculated in the BG14 strain, alpha < 0.000001 in a two-tailed t-test.

## References

1. Emms DM, Kelly S. 2019. OrthoFinder: phylogenetic orthology inference for comparative genomics. *Genome Biol.* 14: 238.
2. Yu G, Smith DK, Zhu H, Guan Y, Lam TT-Y. 2017. ggtree: an r package for visualization and annotation of phylogenetic trees with their covariates and other associated data. *Methods Ecol. Evol.* 8: 28–36.

**Additional File 1.** Primers used in the present study.

| Systematic name | <i>S. cerevisiae</i><br>ortholog | Primer sequence (5' - 3')                              |
|-----------------|----------------------------------|--------------------------------------------------------|
| CAGL0K12694g    | <i>ACT1</i>                      | Fw CGCCGGTGACGATGCTCC<br>Rv CTTGGATTGAGCTTCGT          |
| CAGL0M01760g    | <i>CDR1</i>                      | Fw TCCACCAGATGCTAACCCAG<br>Rv CTCGTTGGACATCCACTCCA     |
| CAGL0F02717g    | <i>CDR2/PDR15</i>                | Fw ATGCTGGGATAACGCTACGA<br>Rv GAGATTGTAGGCGTCTTGCG     |
| CAGL0A00451g    | <i>PDR1</i>                      | Fw ACTGCATCTCCCTTATCGGG<br>Rv ATGGAACGTTGATCTCCCCA     |
| CAGL0L03267g    | <i>GAP1</i>                      | Fw CACTACCTATGCCACGAGATTC<br>Rv TCACCGTAACCTTTACACC    |
| CAGL0G01254g    | <i>ARO8</i>                      | Fw TCTTTCTTGGTGGTGGTCTTC<br>Rv GTCTTCTTGAGAGCCGGTTATAG |

**Additional File 2.** Genes with expression evidence.

**Additional File 3.** Gene expression levels.

**Additional File 4.** Differentially expressed genes.

**Additional File 5.** Genes in KEGG pathways.

KEGG\_up\_genes

KEGG\_down\_genes
